# Supplementary material
Source: Research Square preprint supplement (doi:10.21203/rs.3.rs-10362636/v1)
Supplement: Supplementary file 1 [file cf05e9339d5662eb784fc656.docx]

**Supplementary material**


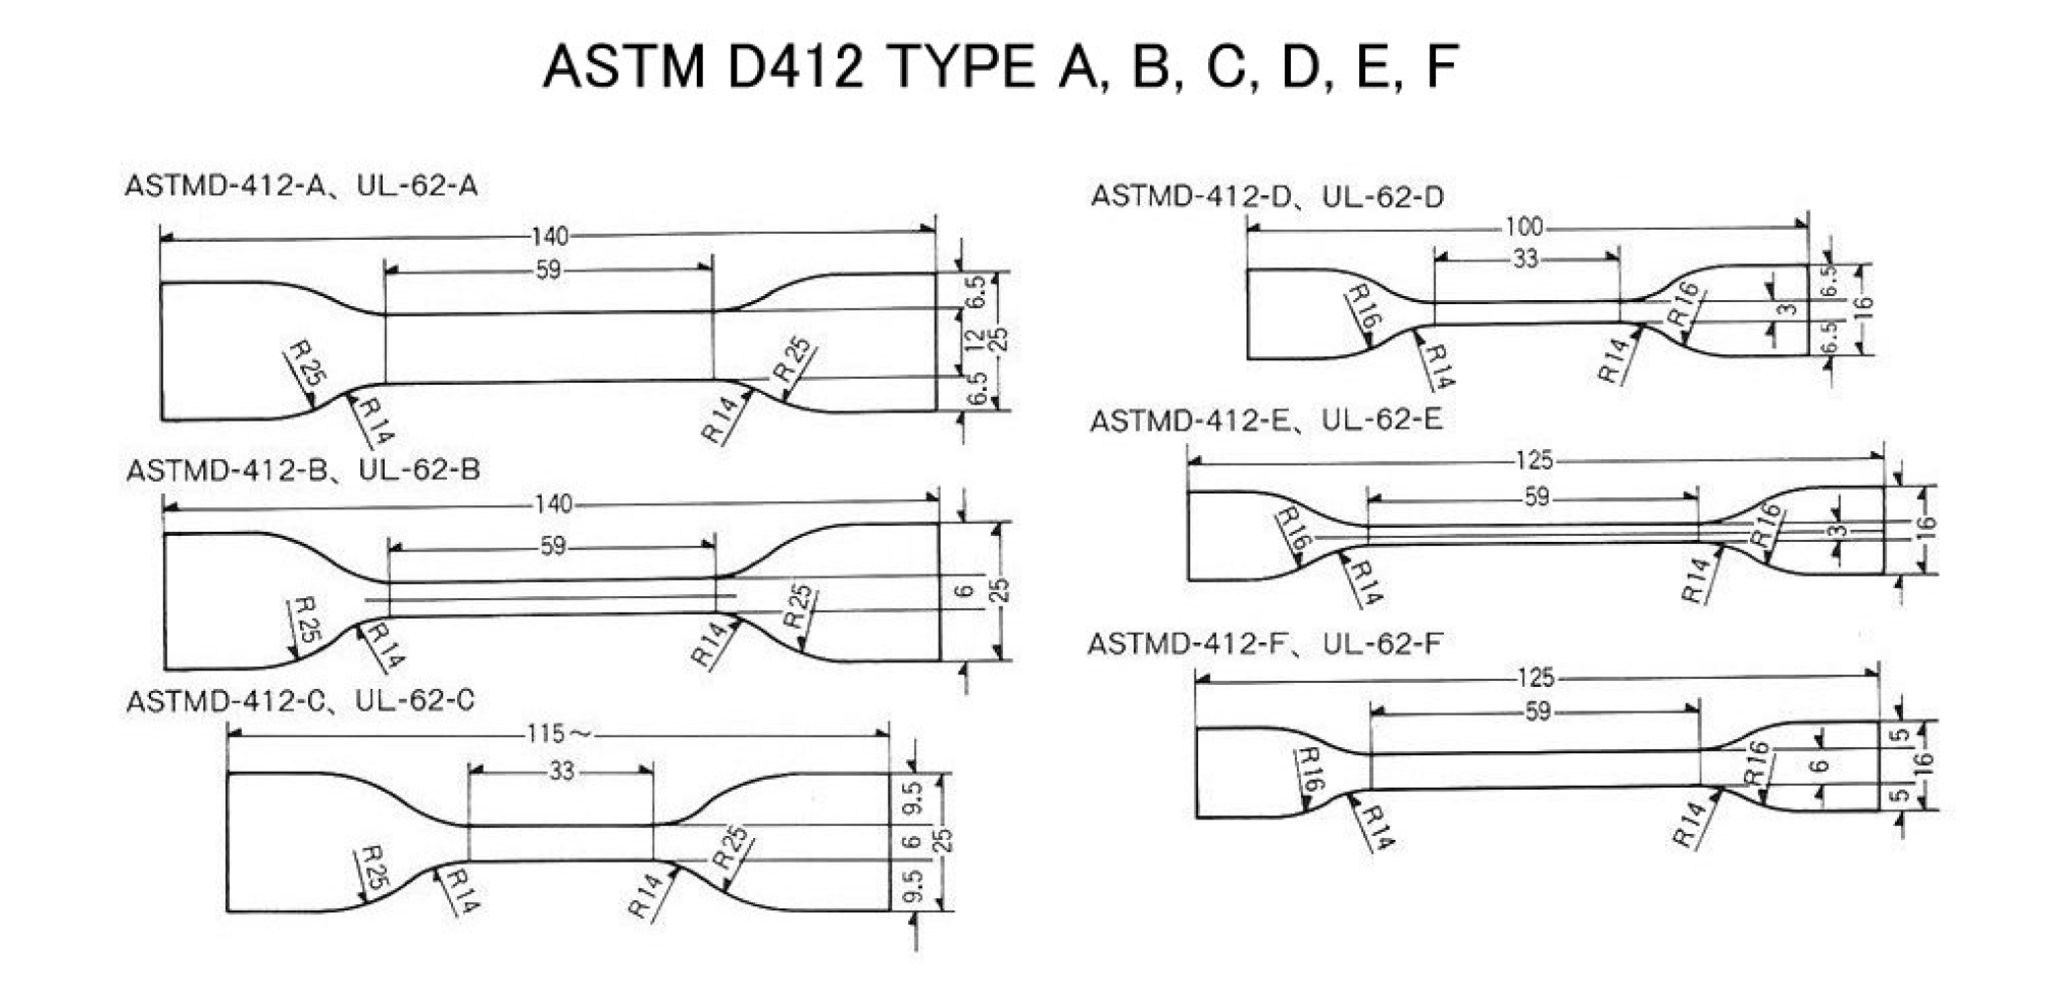


**Supplementary Figure 1.** Dimensions of ASTM D412 specimen types A, B, C, D, E, and F. The Type C geometry used in the present study is included among the standardized dumbbell-shaped specimens.


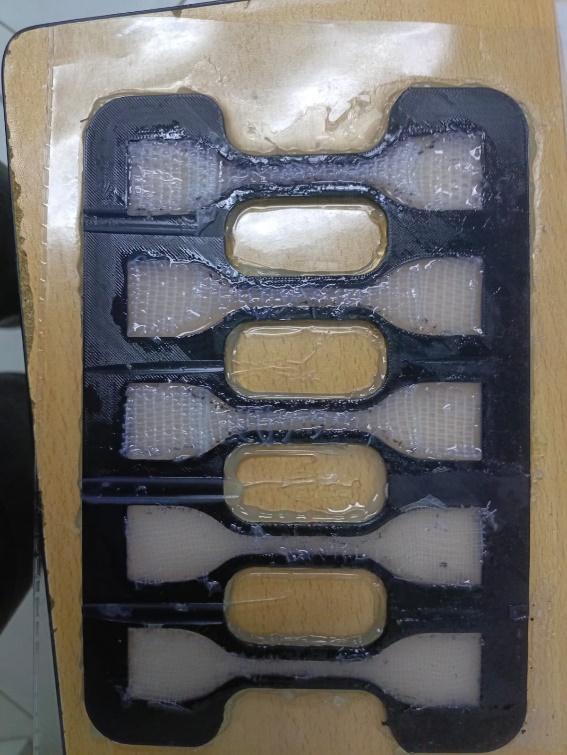


**Supplementary Figure 2.** Biopolymer laminate specimens fabricated using a 3D-printed mold prior to mechanical testing.


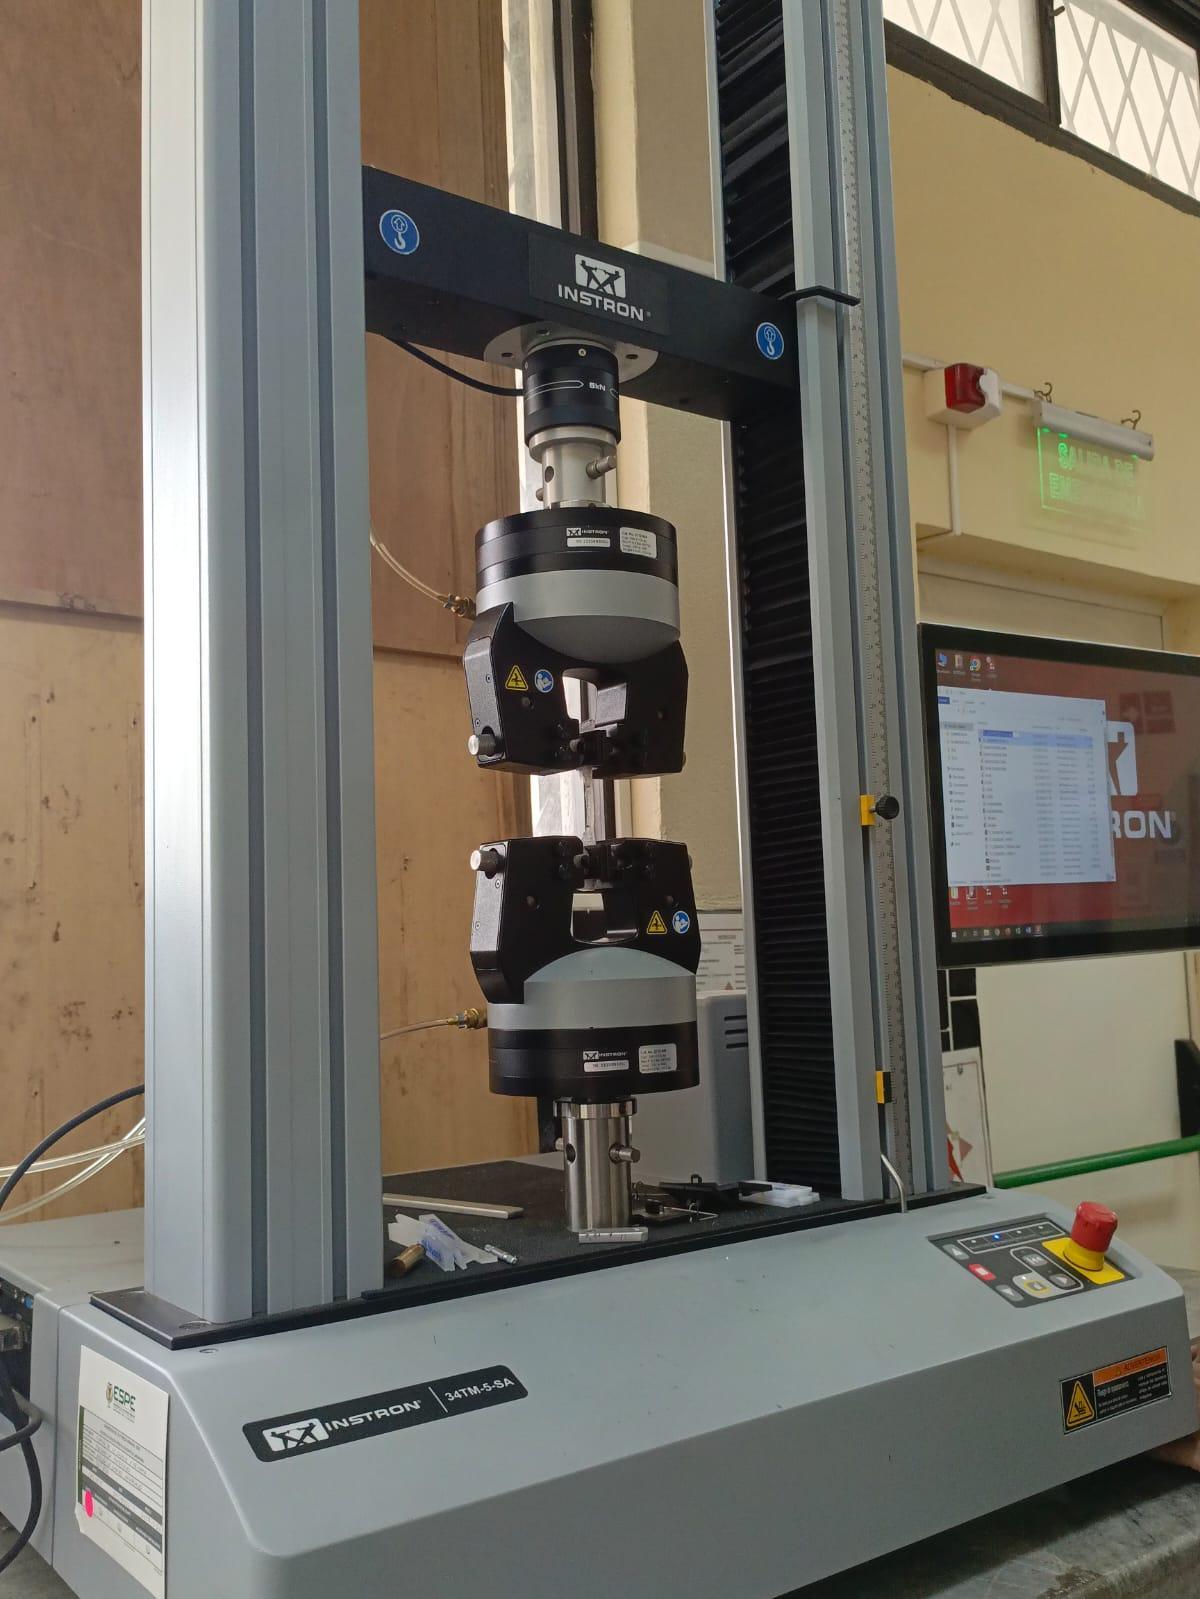


**Supplementary Figure 3.** Tensile testing setup using an Instron universal testing machine for mechanical characterization of the fabricated specimens.


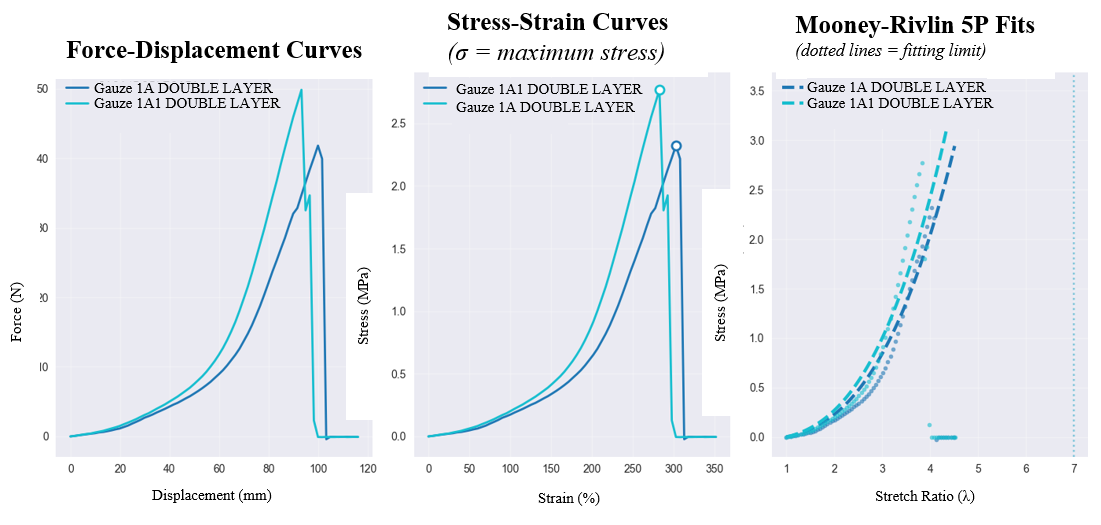


**Supplementary Figure 4.** Tensile test results for Gauze Family 1 in the double-layer configuration.


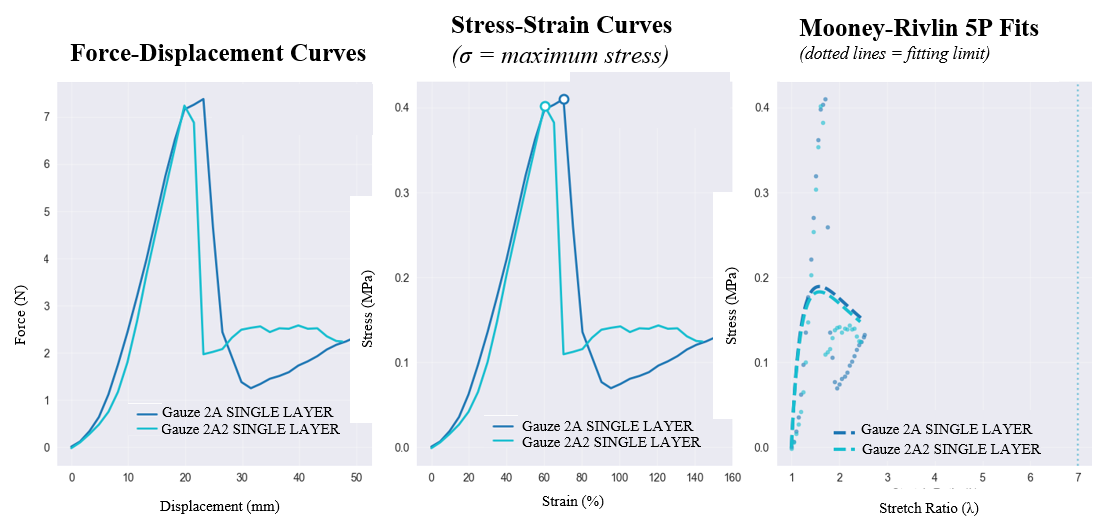


**Supplementary Figure 5.** Tensile test results for Gauze Family 2 in the single-layer configuration.


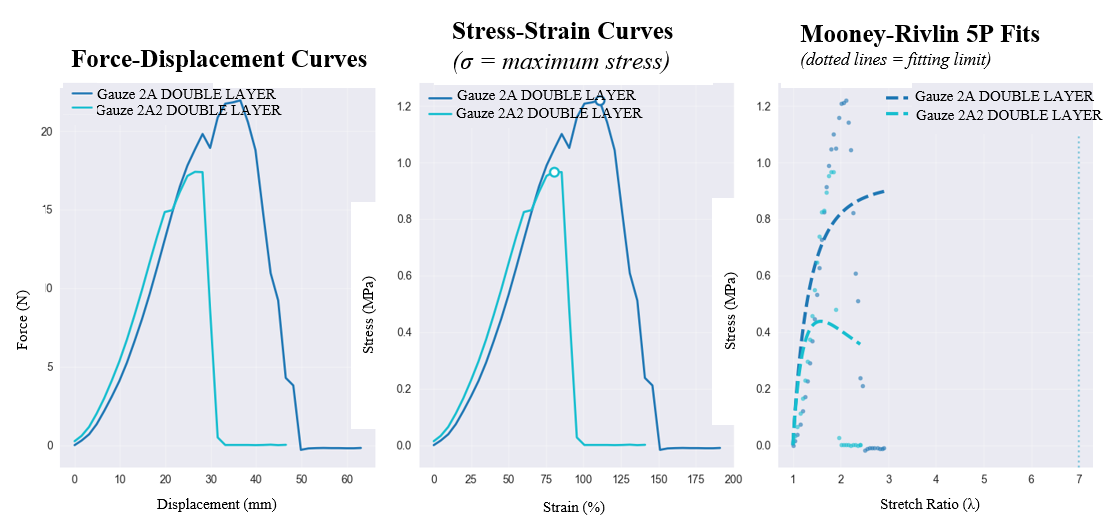


**Supplementary Figure 6.** Tensile test results for Gauze Family 2 in the double-layer configuration.


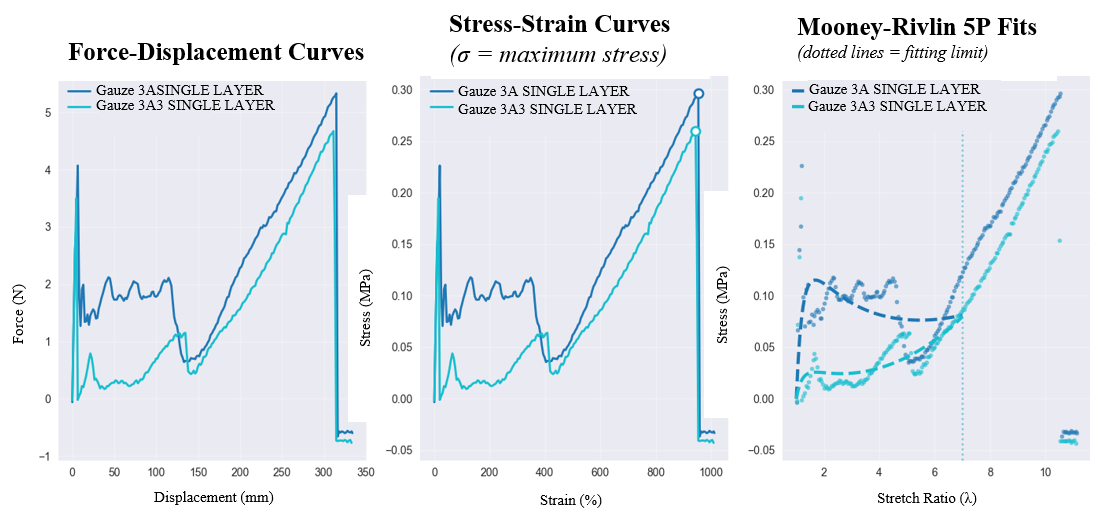


**Supplementary Figure 7.** Tensile test results for Gauze Family 3 in the single-layer configuration.


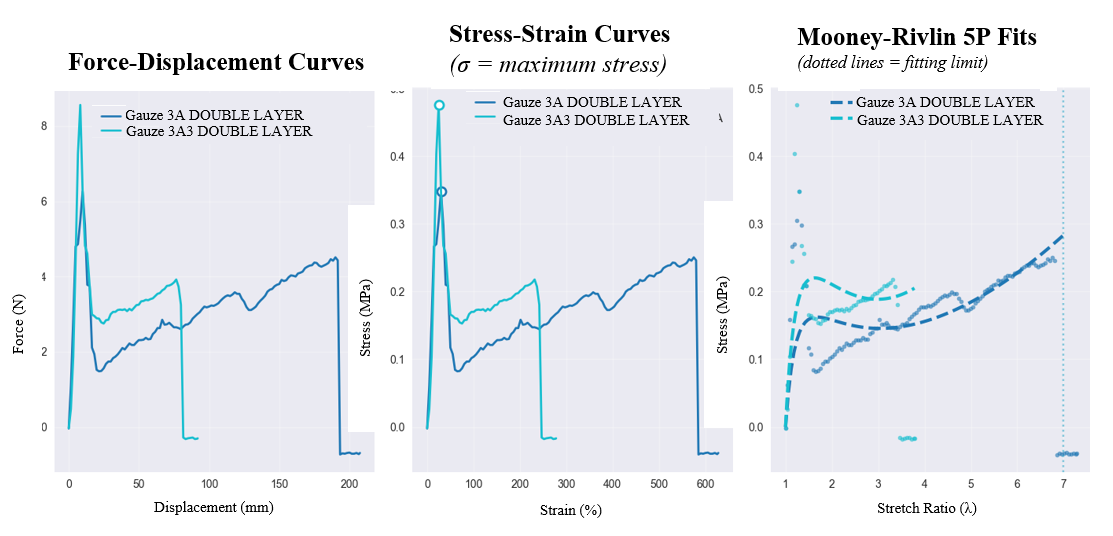


**Supplementary Figure 8.** Tensile test results for Gauze Family 3 in the double-layer configuration.


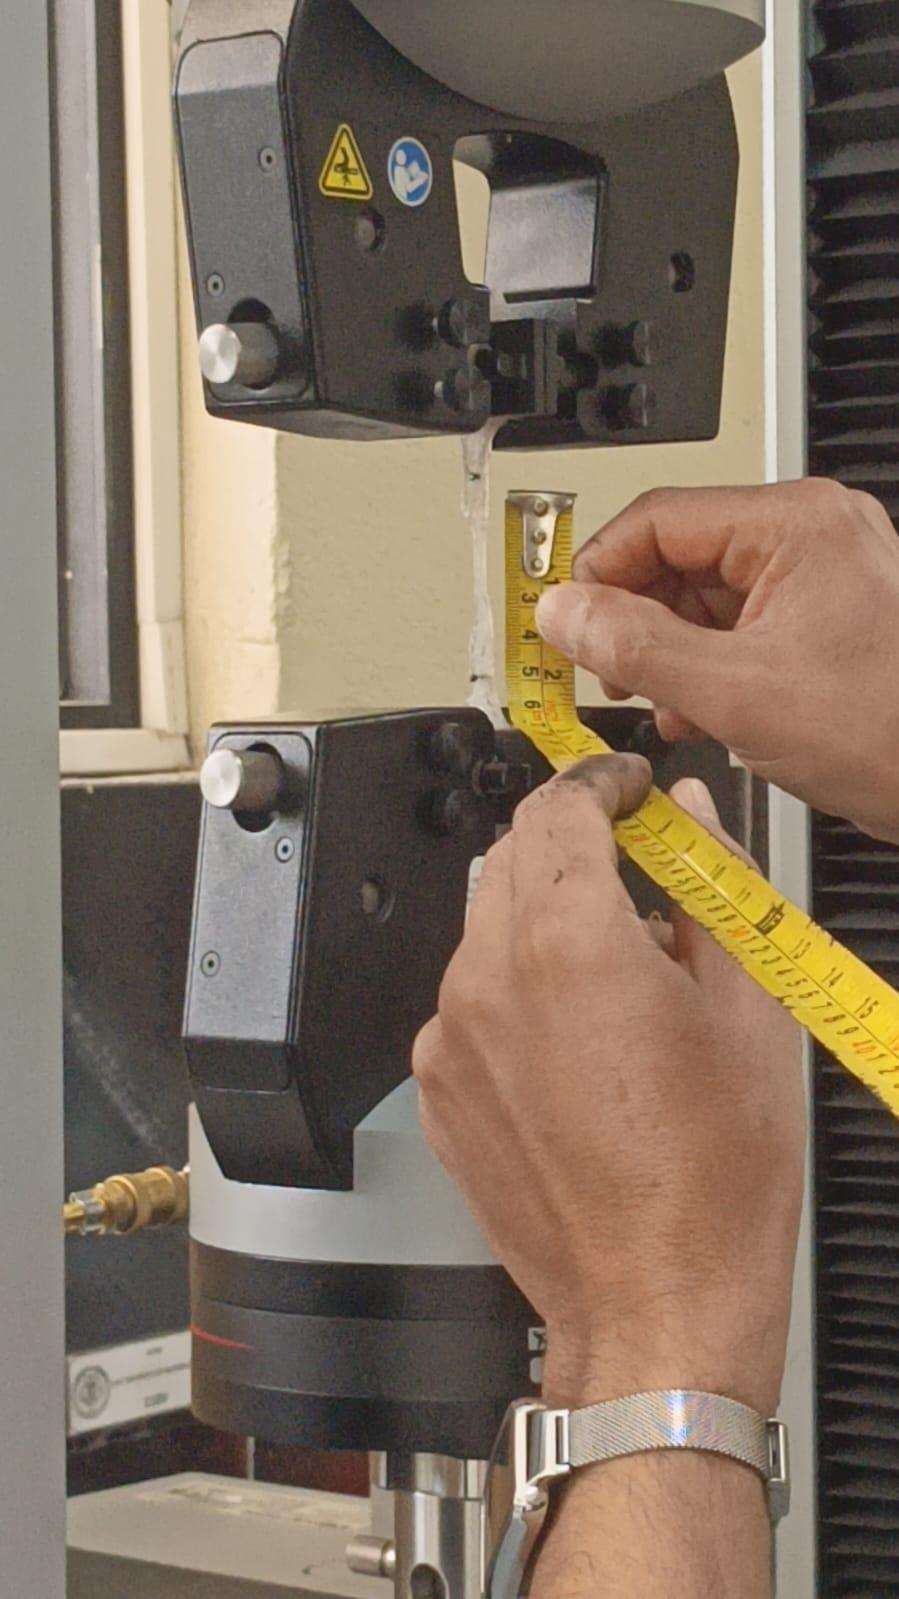


**Supplementary Figure 9.** Measurement of specimen stretching and deformation during tensile testing.


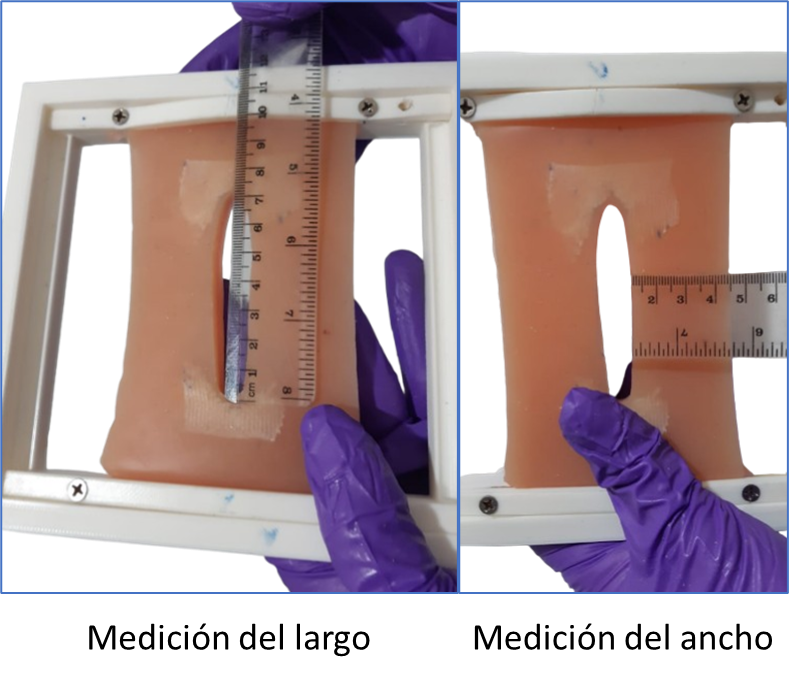


**Supplementary Figure 10.** Initial measurement of the length and width of the opening in the simulation prototype; Two-panel photograph showing baseline measurement of the prototype opening using a ruler, with one panel measuring length and the other measuring width.


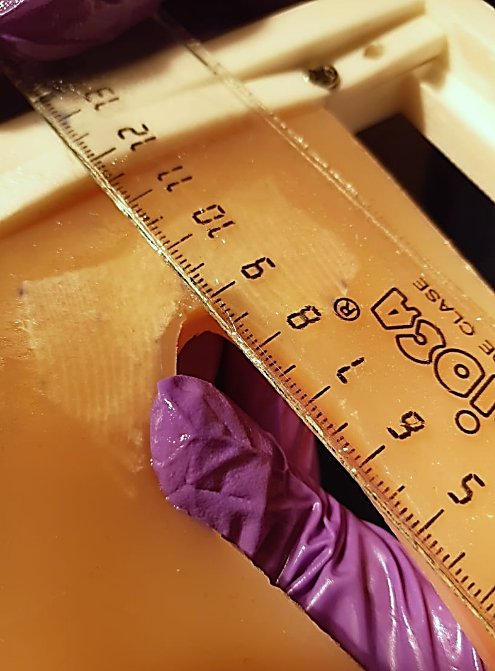
´

**Supplementary Figure 11.** Measurement of the superficial tear in the upper frontal region of the prototype; Close-up photograph showing measurement of a superficial tear in the upper frontal region of the prototype using a ruler.
